# Supplementary material
Source: Research Square preprint supplement (doi:10.21203/rs.3.rs-9587466/v1)
Supplement: Supplementary file 1 [file 31a68b41ab016ae83b9023dc.pdf]

1 **Declining global scientific mobility and persistent inequality in an**  
2 **expanding research system**

3 **Appendix**

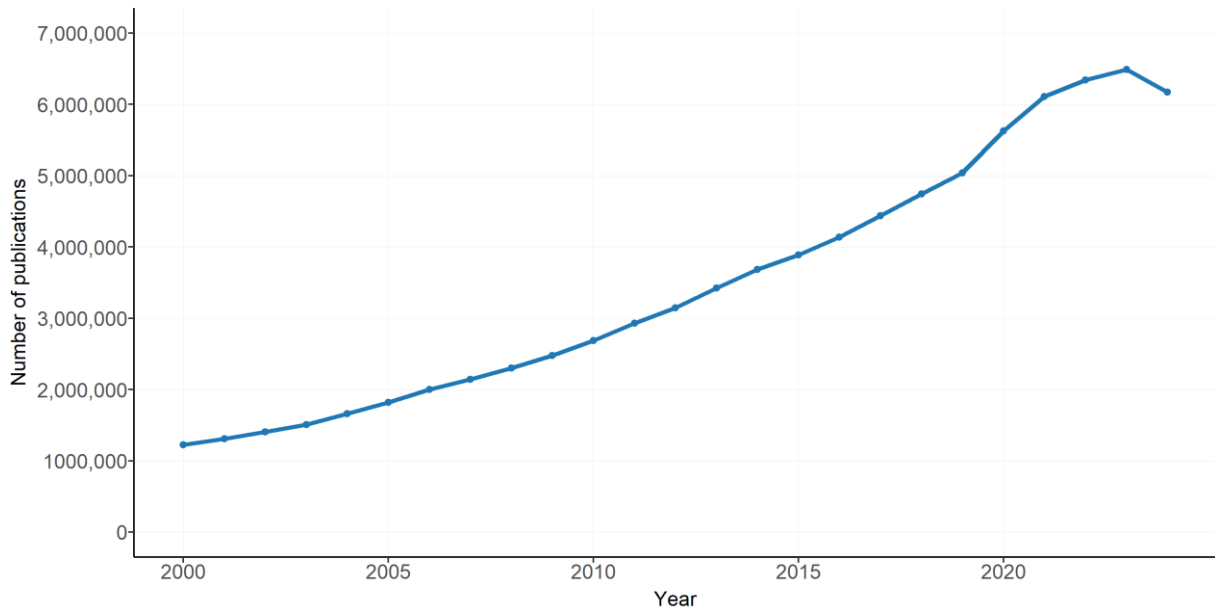

4  
5 **Figure A1. Trends in the annual number of distinct publications indexed in the Dimensions**  
6 **database, 2000–2024.**

7

1  
2  
3  
4  
5  
6  
7

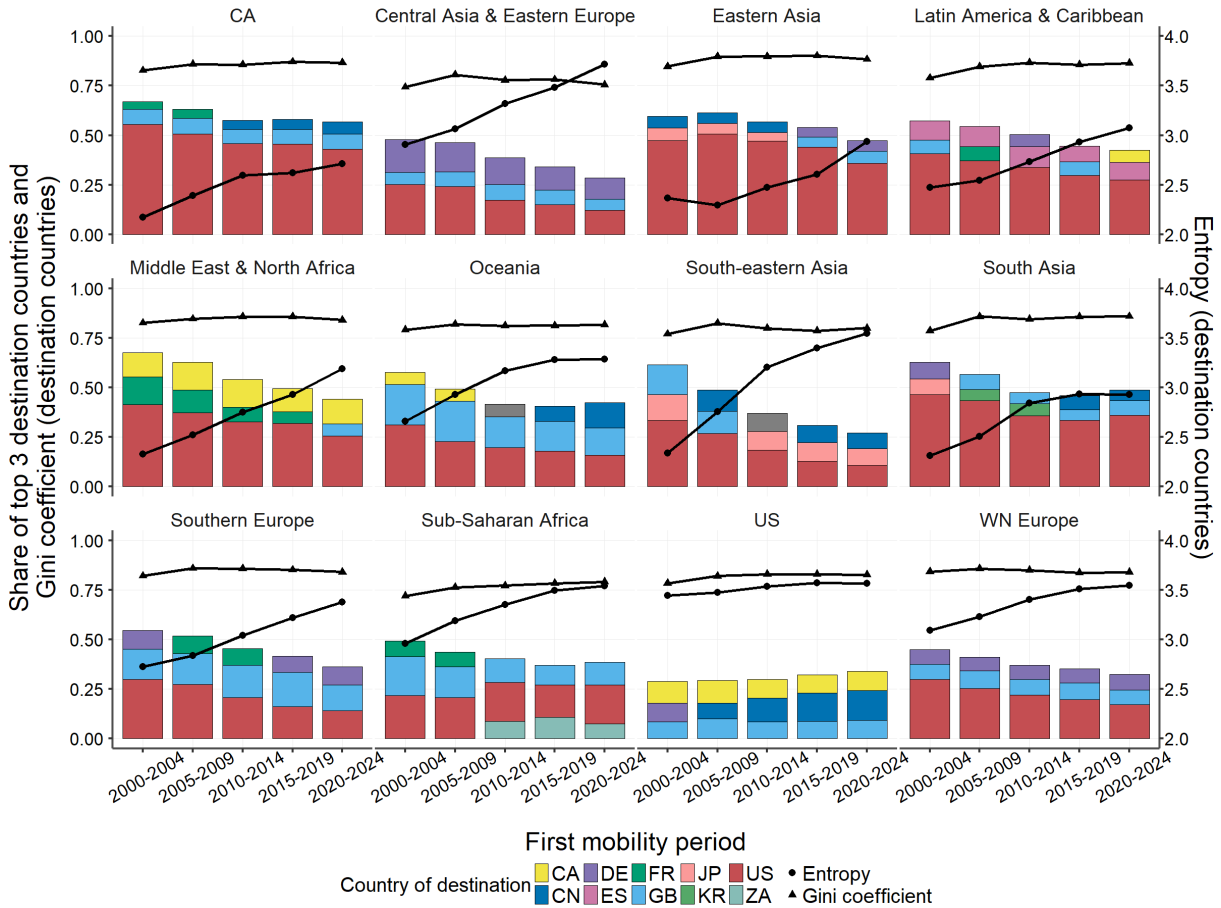

8  
9  
10  
11  
12  
13  
14  
15

Figure A2. Top three destination countries (stacked bars) and country-level entropy (triangles) and Gini coefficient (circles) across five periods, by region of origin. The bars show the combined share of the three most common destination countries in each period. Higher entropy indicates a more diverse distribution across destination countries. Higher Gini indicates a more uneven distribution across destination countries.

1  
2  
3

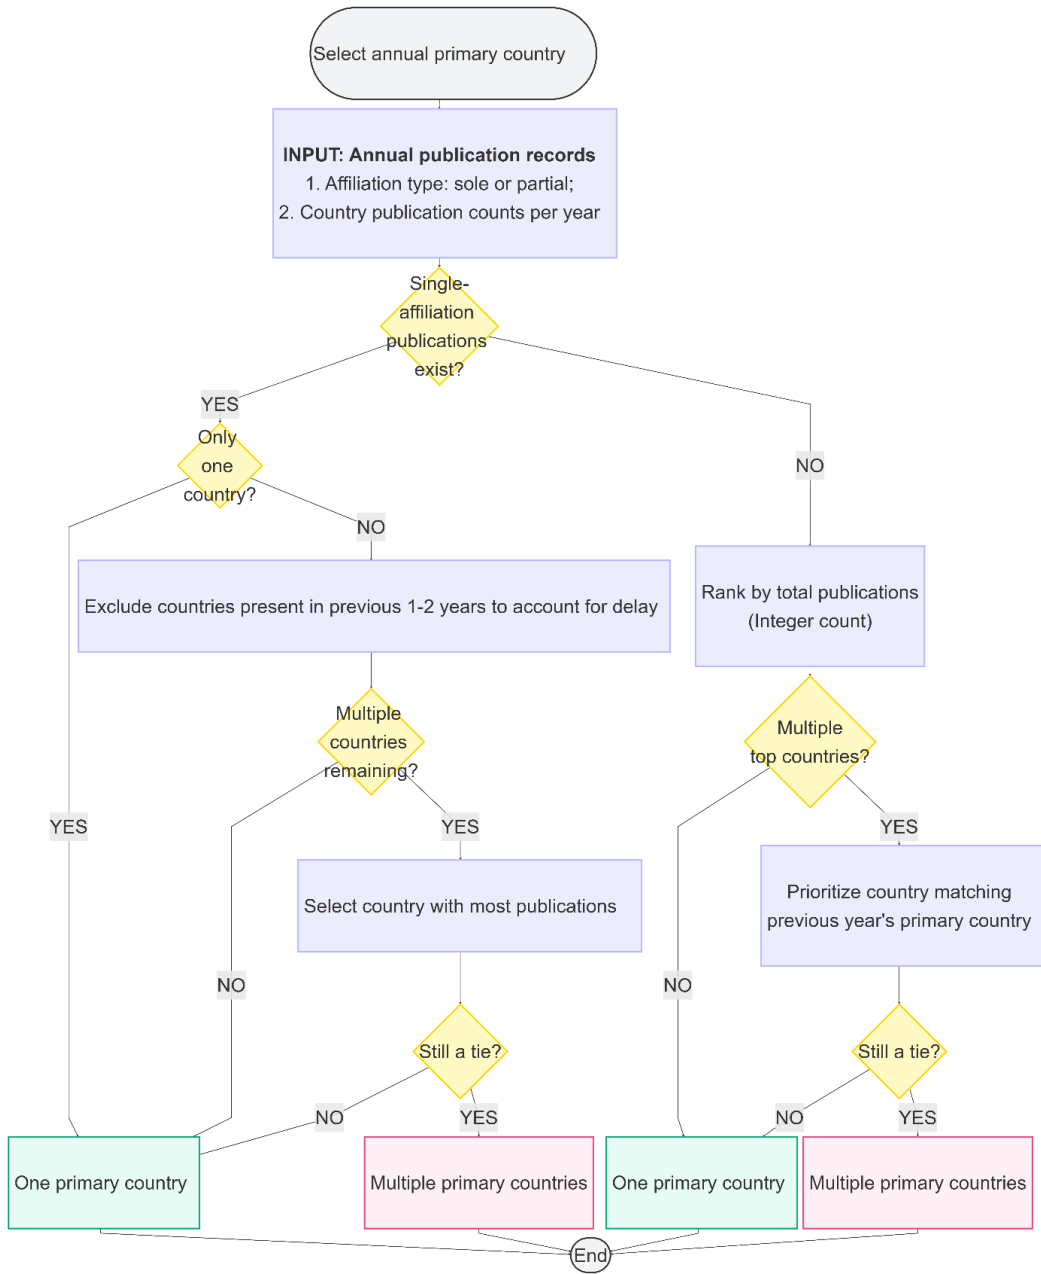

4

5 Figure A3. Methodology for selecting annual primary countries from publication data.

6  
7  
8  
9

1 Table A1. Regional classifications and their corresponding country lists.

| Region classification         | Country name in the World Bank                                                                                                                                                                                                                                                                                                                                                                                                                                                                                                                                            |
|-------------------------------|---------------------------------------------------------------------------------------------------------------------------------------------------------------------------------------------------------------------------------------------------------------------------------------------------------------------------------------------------------------------------------------------------------------------------------------------------------------------------------------------------------------------------------------------------------------------------|
| CA                            | Canada                                                                                                                                                                                                                                                                                                                                                                                                                                                                                                                                                                    |
| Central Asia & Eastern Europe | Armenia; Azerbaijan; Belarus; Bulgaria; Cyprus; Czechia; Georgia; Hungary; Kazakhstan; Kyrgyz Republic; Moldova; Poland; Romania; Russian Federation; Slovak Republic; Tajikistan; Türkiye; Turkmenistan; Ukraine; Uzbekistan                                                                                                                                                                                                                                                                                                                                             |
| Eastern Asia                  | China; Hong Kong SAR, China; Japan; Korea, Dem. Rep.; Korea, Rep.; Macao SAR, China; Mongolia; Taiwan, China                                                                                                                                                                                                                                                                                                                                                                                                                                                              |
| Latin America & Caribbean     | Antigua and Barbuda; Argentina; Aruba; Bahamas, The; Barbados; Belize; Bolivia; Brazil; British Virgin Islands; Cayman Islands; Chile; Colombia; Costa Rica; Cuba; Curacao; Dominica; Dominican Republic; Ecuador; El Salvador; Grenada; Guatemala; Guyana; Haiti; Honduras; Jamaica; Mexico; Nicaragua; Panama; Paraguay; Peru; Puerto Rico; Sint Maarten (Dutch part); St. Kitts and Nevis; St. Lucia; St. Martin (French part); St. Vincent and the Grenadines; Suriname; Trinidad and Tobago; Turks and Caicos Islands; Uruguay; Venezuela, RB; Virgin Islands (U.S.) |
| Middle East & North Africa    | Algeria; Bahrain; Djibouti; Egypt, Arab Rep.; Iran, Islamic Rep.; Iraq; Israel; Jordan; Kuwait; Lebanon; Libya; Malta; Morocco; Oman; Qatar; Saudi Arabia; Syrian Arab Republic; Tunisia; United Arab Emirates; West Bank and Gaza; Yemen, Rep.                                                                                                                                                                                                                                                                                                                           |
| Oceania                       | American Samoa; Australia; Fiji; French Polynesia; Guam; Kiribati; Marshall Islands; Micronesia, Fed. Sts.; Nauru; New Caledonia; New Zealand; Northern Mariana Islands; Palau; Papua New Guinea; Samoa; Solomon Islands; Tonga; Tuvalu; Vanuatu                                                                                                                                                                                                                                                                                                                          |
| South Asia                    | Afghanistan; Bangladesh; Bhutan; India; Maldives; Nepal; Pakistan; Sri Lanka                                                                                                                                                                                                                                                                                                                                                                                                                                                                                              |
| South-eastern Asia            | Brunei Darussalam; Cambodia; Indonesia; Lao PDR; Malaysia; Myanmar; Philippines; Singapore; Thailand; Timor-Leste; Vietnam                                                                                                                                                                                                                                                                                                                                                                                                                                                |
| Southern Europe               | Albania; Andorra; Bosnia and Herzegovina; Croatia; Gibraltar; Greece; Italy; Montenegro; North Macedonia; Portugal; San Marino; Serbia; Slovenia; Spain                                                                                                                                                                                                                                                                                                                                                                                                                   |
| Sub-Saharan Africa            | Angola; Benin; Botswana; Burkina Faso; Burundi; Cabo Verde; Cameroon; Central African Republic; Chad; Comoros; Congo, Dem. Rep.; Congo, Rep.; Côte d'Ivoire; Equatorial Guinea; Eritrea; Eswatini; Ethiopia; Gabon; Gambia, The; Ghana; Guinea; Guinea-Bissau; Kenya; Lesotho; Liberia; Madagascar; Malawi; Mali; Mauritania; Mauritius; Mozambique; Namibia; Niger; Nigeria; Rwanda; São Tomé and Príncipe; Senegal; Seychelles; Sierra Leone; Somalia; South Africa; South Sudan; Sudan; Tanzania; Togo; Uganda; Zambia; Zimbabwe                                       |
| US                            | United States                                                                                                                                                                                                                                                                                                                                                                                                                                                                                                                                                             |
| Western & Northern Europe     | Austria; Belgium; Denmark; Estonia; Faeroe Islands; Finland; France; Germany; Greenland; Iceland; Ireland; Isle of Man; Latvia; Liechtenstein; Lithuania; Luxembourg; Monaco; Netherlands; Norway; Sweden; Switzerland; United Kingdom                                                                                                                                                                                                                                                                                                                                    |

2

1 Table A2. Example of annual primary-country assignment and mobility identification.

| Publication year | Primary country in previous publication year(s) | Single-affiliation publication counts | Multiple-affiliation publication counts    | Decision rule                                                           | Primary country | Mobility event                |
|------------------|-------------------------------------------------|---------------------------------------|--------------------------------------------|-------------------------------------------------------------------------|-----------------|-------------------------------|
| 2017             | None                                            | China = 2                             | –                                          | First observed year;<br>one single-affiliation country only             | China           | Entry year                    |
| 2019             | China                                           | China = 3                             | –                                          | One single-affiliation country only                                     | China           | No mobility                   |
| 2020             | China                                           | Netherlands = 1,<br>China = 1         | –                                          | Exclude old country (China);<br>retain Netherlands                      | Netherlands     | China → Netherlands           |
| 2021             | Netherlands                                     | –                                     | Germany = 3,<br>Netherlands = 2,<br>US = 1 | No single-affiliation recorded;<br>choose top multi-affiliation country | Germany         | Netherlands → Germany         |
| 2022             | Germany                                         | –                                     | Germany = 2, US = 2                        | Tie in multi-affiliation counts;<br>retain previous primary country     | Germany         | No mobility                   |
| 2023             | Germany                                         | US = 2,<br>UK = 2,<br>Germany = 1     | –                                          | Exclude old country (Germany);<br>tie remains between new countries     | US and UK       | Germany → US;<br>Germany → UK |

2

3 **Example of the standardization framework for return rates**

4 Table A3 presents a simplified example of the calculation of the jointly standardized annual  
5 return rate. Standardization is based on two dimensions: first-publication year ( $c$ ) and years  
6 since leaving the country of origin by calendar year  $t$  ( $d$ ). In this example, among researchers  
7 from the 2000 cohort, 100 left in 2001, of whom 20 returned in 2002 and 30 returned in 2003;  
8 200 left in 2002, of whom 50 returned in 2003. Among researchers from the 2001 cohort, 150  
9 left in 2002, of whom 35 returned in 2003.

10

1 Table A3. Worked example of the calculation of jointly standardized annual return rates,  
 2 2002-2003.

| Calendar year<br>( $t$ ) | Cohort ( $c$ ) | Leaving year | Years since<br>leaving ( $d$ ) | $N_{t,c,d}$ | $R_{t,c,d}$ | $r_{t,c,d}$ |
|--------------------------|----------------|--------------|--------------------------------|-------------|-------------|-------------|
| 2002                     | 2000           | 2001         | 1                              | 100         | 20          | 0.2         |
| 2003                     | 2000           | 2001         | 2                              | 80          | 30          | 0.375       |
| 2003                     | 2000           | 2002         | 1                              | 200         | 50          | 0.25        |
| 2003                     | 2001           | 2002         | 1                              | 150         | 35          | 0.2333      |

3  
 4 Fixed base weights were derived from the pooled reference population across 2002–2003.  
 5 Thus,  $\sum_t N_{t,2000,1} = 100 + 200 = 300$ ,  $\sum_t N_{t,2000,2} = 80$ , and  $\sum_t N_{t,2001,1} = 150$ . Base  
 6 weights  $W_{2000,1}=300/530=0.5660$ ,  $W_{2000,2}=80/530=0.1509$ , and  $W_{2001,1}=150/530=0.2830$   
 7 The cell-specific return rate is defined as:

$$8 \quad r_{t,c,d} = \frac{R_{t,c,d}}{N_{t,c,d}}$$

9 The jointly standardized annual return rate is then calculated as:

$$10 \quad r_t^{std} = \sum_{(c,d) \in S_t} \tilde{w}_{t,c,d} r_{t,c,d}, \quad \tilde{w}_{t,c,d} = \frac{w_{c,d}}{\sum_{(c,d) \in S_t} w_{c,d}}$$

11  
 12 For 2002, only one ( $c, d$ ) cell is observed, so  $r_{2002}^{std} = r_{2002}^{raw} = 0.2$

13 For 2003, the standardized annual return rate is:

$$14 \quad r_{2003}^{std} = 0.5660 \times 0.2500 + 0.1509 \times 0.3750 + 0.2830 \times 0.2333 = 0.2642.$$

15 For comparison, the raw annual return rate for 2003 is  $r_{2003}^{raw} = 115/430 = 0.2674$ .

16

17 Table A4. General overview of researchers' mobility types (2000–2024).

| Type of international<br>mobility | Number of<br>researchers | Number of publications<br>contributed | Ave. publications per<br>researcher |
|-----------------------------------|--------------------------|---------------------------------------|-------------------------------------|
| Non-mobile                        | 19,073,260 (94.7%)       | 45,990,556 (91.5%)                    | 2.4                                 |
| Mobile                            | 1,065,526 (5.3%)         | 18,896,498 (37.6%)                    | 17.7                                |

18
